# Supplementary material for: Receptor-interacting protein kinase 2 (RIPK2) profoundly contributes to post-stroke neuroinflammation and behavioral deficits with microglia as unique perpetrators
Source: PubMed Central journal article supplement (PMC10543871; doi:10.1186/s12974-023-02907-6), 2023-09-30
Supplement: 12974_2023_2907_MOESM1_ESM.pdf [file 12974_2023_2907_MOESM1_ESM.pdf]

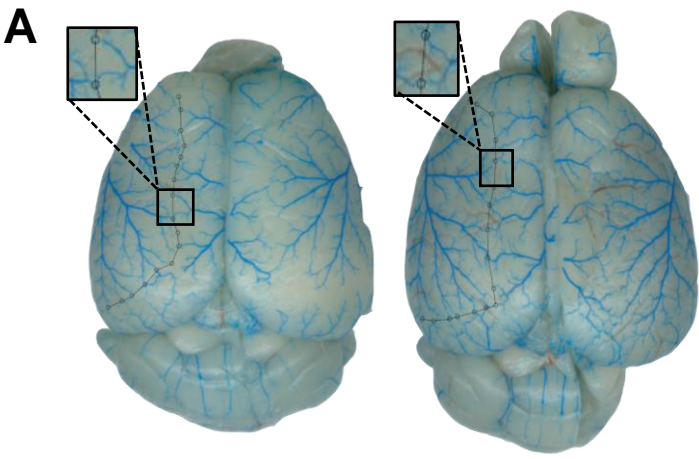

*Ripk2*<sup>+/+</sup>

*Ripk2*<sup>-/-</sup>

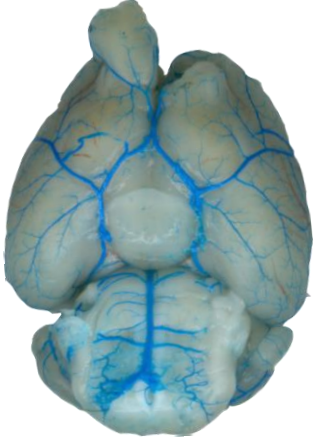

*Ripk2*<sup>+/+</sup>

*Ripk2*<sup>-/-</sup>

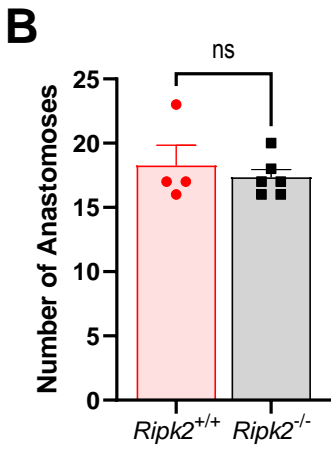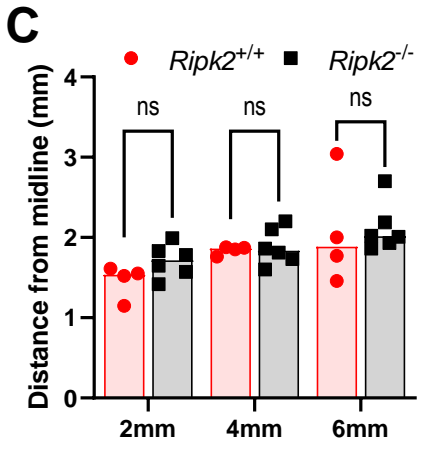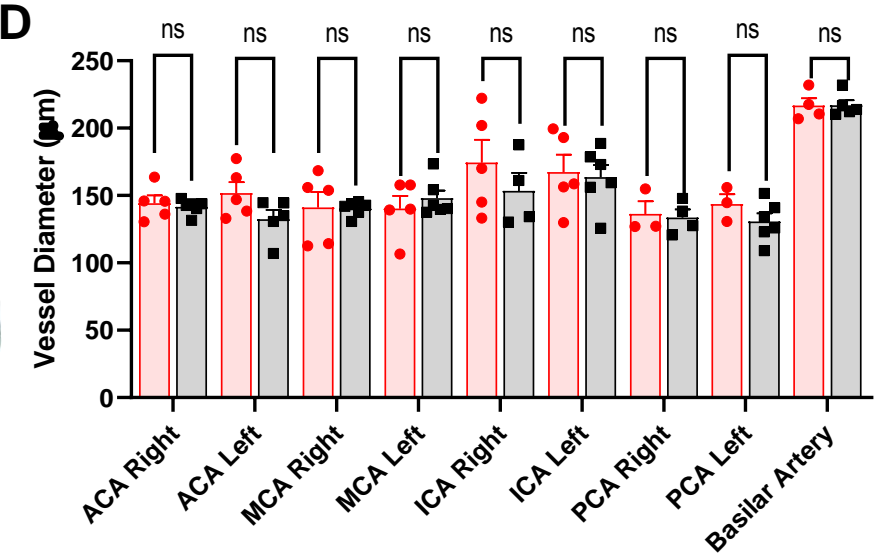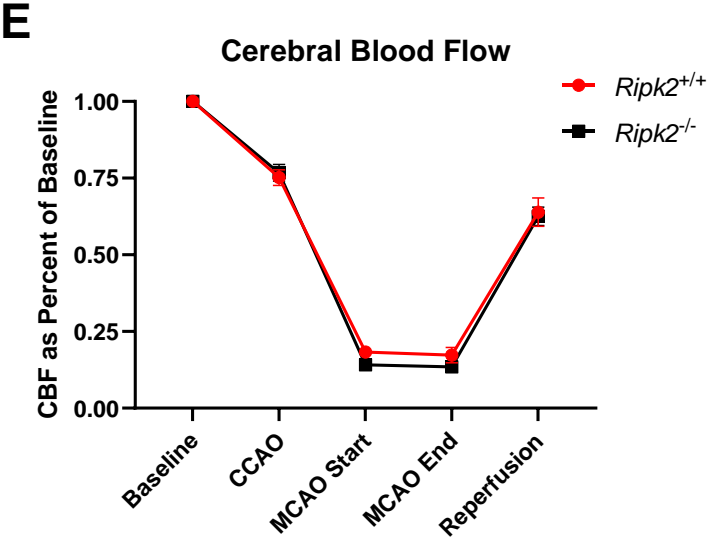

**Additional File 1:** *Ripk2*<sup>-/-</sup> mice show no differences in cerebral vessel parameters at baseline or cerebral blood flow during stroke surgery. **A** Representative vessel casting images depicting the superior (top) and inferior (bottom) views of *Ripk2*<sup>-/-</sup> and *Ripk2*<sup>+/+</sup> following latex vessel casting. Square inserts depict method for measuring the distance from baseline and for counting the number of anastomoses. **B** The number of anastomotic connections between vessels originating from the brain midline to the branches of the middle cerebral artery. **C** The distance from anastomotic connections to the brain midline. **D** The diameter of various cerebral arteries. **E** Cerebral blood flow measured during tMCAO surgery for both genotypes. (A-D) n=4-5/group. Differences determined by Student's t test (B) or two-way ANOVA (C-D). Abbreviations: ACA: anterior cerebral artery, MCA: middle cerebral artery, ICA: internal carotid artery, PCA: posterior cerebral artery.
