# Supplementary material for: Receptor-interacting protein kinase 2 (RIPK2) profoundly contributes to post-stroke neuroinflammation and behavioral deficits with microglia as unique perpetrators
Source: PubMed Central journal article supplement (PMC10543871; doi:10.1186/s12974-023-02907-6), 2023-09-30
Supplement: 12974_2023_2907_MOESM2_ESM.pdf [file 12974_2023_2907_MOESM2_ESM.pdf]

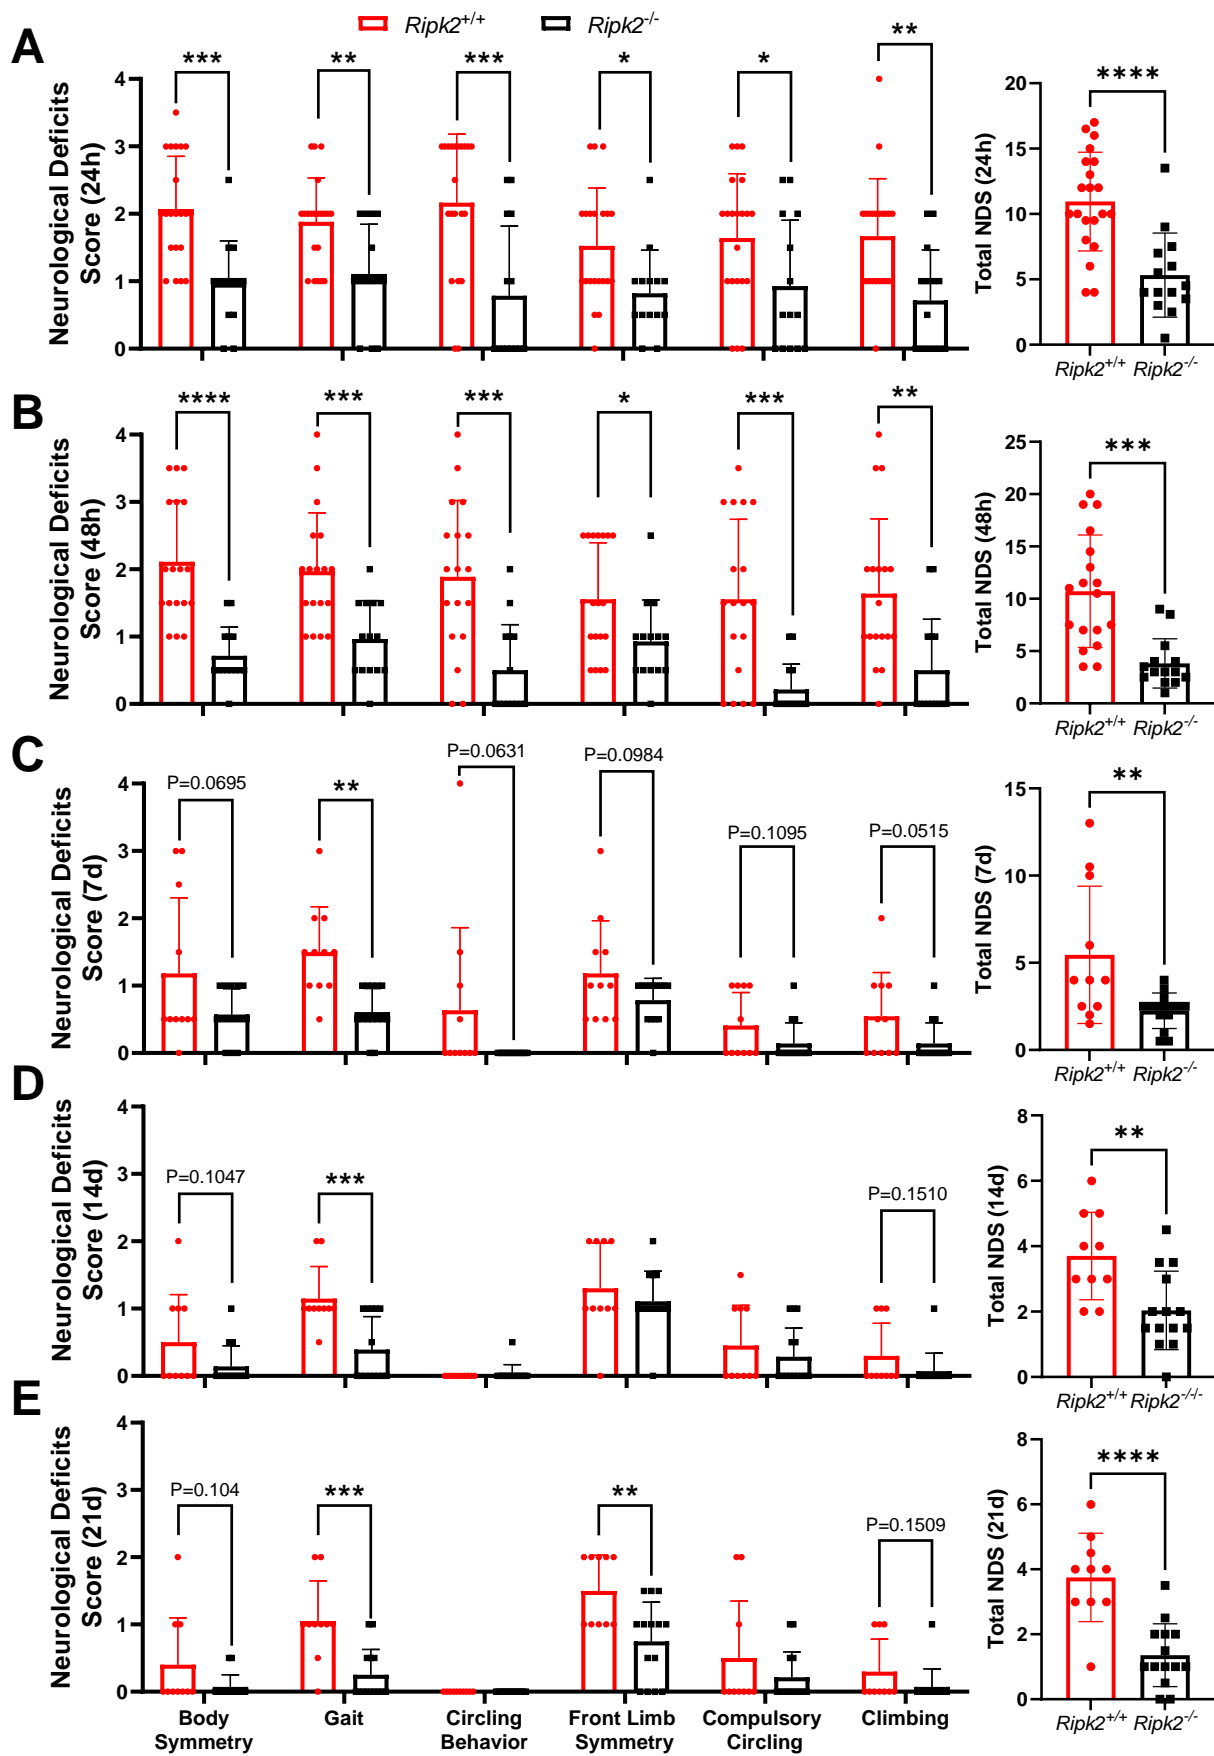

**Additional File 2:** Differences in neurological deficit score parameters between *Ripk2*<sup>-/-</sup> and *Ripk2*<sup>+/+</sup> mice during the 28-day longitudinal study. **A-E** Neurological deficit scores for each of the five parameters, with total scores for each indicated timepoint. Scores were recorded at 24h (A), 48h (B), 7d (C), 14d (D), and 21d (E) post-stroke. n=14-21 per group at 24h and 48h, n=11-14/genotype at 7d, n=10-14/genotype at 14d and 21d. Differences determined by Mann-Whitney test. \* P<0.05, \*\* P<0.01  
\*\*\* P<0.001 \*\*\*\* P<0.0001
