# Supplementary material for: Receptor-interacting protein kinase 2 (RIPK2) profoundly contributes to post-stroke neuroinflammation and behavioral deficits with microglia as unique perpetrators
Source: PubMed Central journal article supplement (PMC10543871; doi:10.1186/s12974-023-02907-6), 2023-09-30
Supplement: 12974_2023_2907_MOESM4_ESM.pdf [file 12974_2023_2907_MOESM4_ESM.pdf]

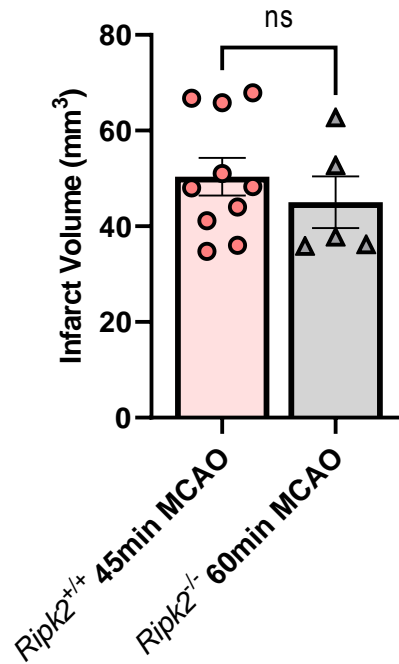

**Additional File 4:** *Ripk2*<sup>-/-</sup> mice experience similar infarct volumes with 60min of occlusion compared to *Ripk2*<sup>+/+</sup> with 45min of occlusion. To correct for differences in infarct volume before performing our bulk RNAseq on microglia, the *Ripk2*<sup>-/-</sup> mice were subjected to an additional 15min of occlusion time compared to *Ripk2*<sup>+/+</sup> mice. This produced a similar level of infarction between the two genotypes. n=5-10mice/group. No differences determined by Student's t test.
