# Supplementary material for: Receptor-interacting protein kinase 2 (RIPK2) profoundly contributes to post-stroke neuroinflammation and behavioral deficits with microglia as unique perpetrators
Source: PubMed Central journal article supplement (PMC10543871; doi:10.1186/s12974-023-02907-6), 2023-09-30
Supplement: 12974_2023_2907_MOESM5_ESM.pdf [file 12974_2023_2907_MOESM5_ESM.pdf]

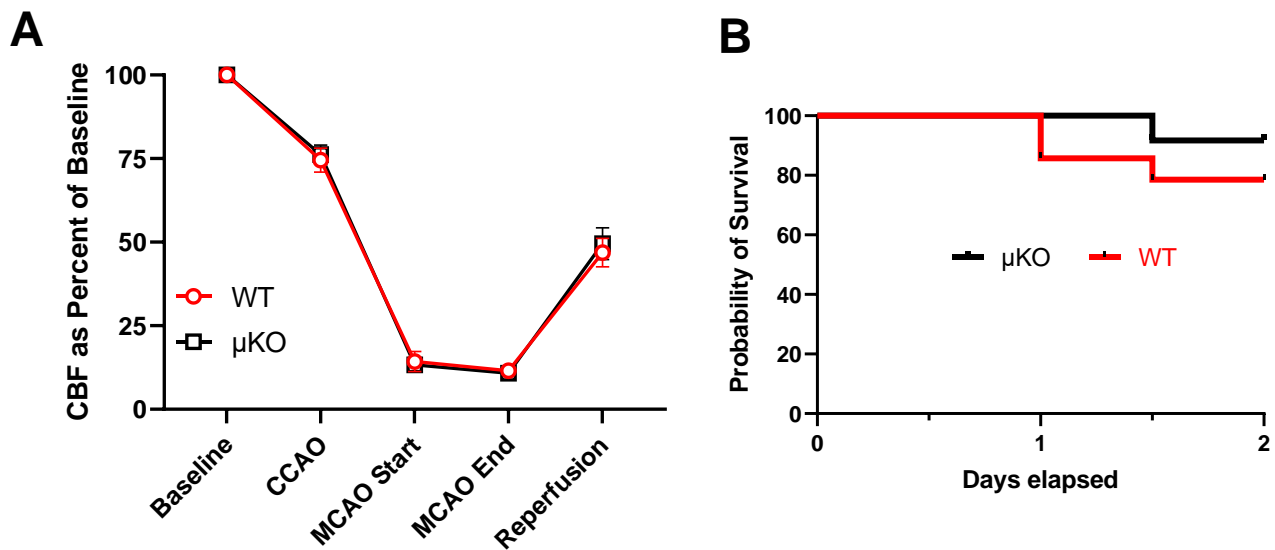

**Additional File 5: A** No observed differences in cerebral blood flow during the course of tMCAO surgery in WT vs  $\mu$ KO mice. **B** No statistical differences in survival during the 48h period following stroke induction, however  $\mu$ KO mice suffered 1 animal loss compared to 3 in the WT group. n=13/genotype.
