# Supplementary material for: Receptor-interacting protein kinase 2 (RIPK2) profoundly contributes to post-stroke neuroinflammation and behavioral deficits with microglia as unique perpetrators
Source: PubMed Central journal article supplement (PMC10543871; doi:10.1186/s12974-023-02907-6), 2023-09-30

**Fig1A**

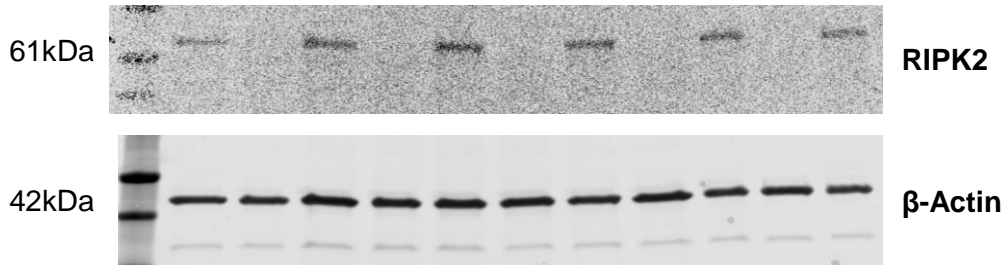

**Fig2C**

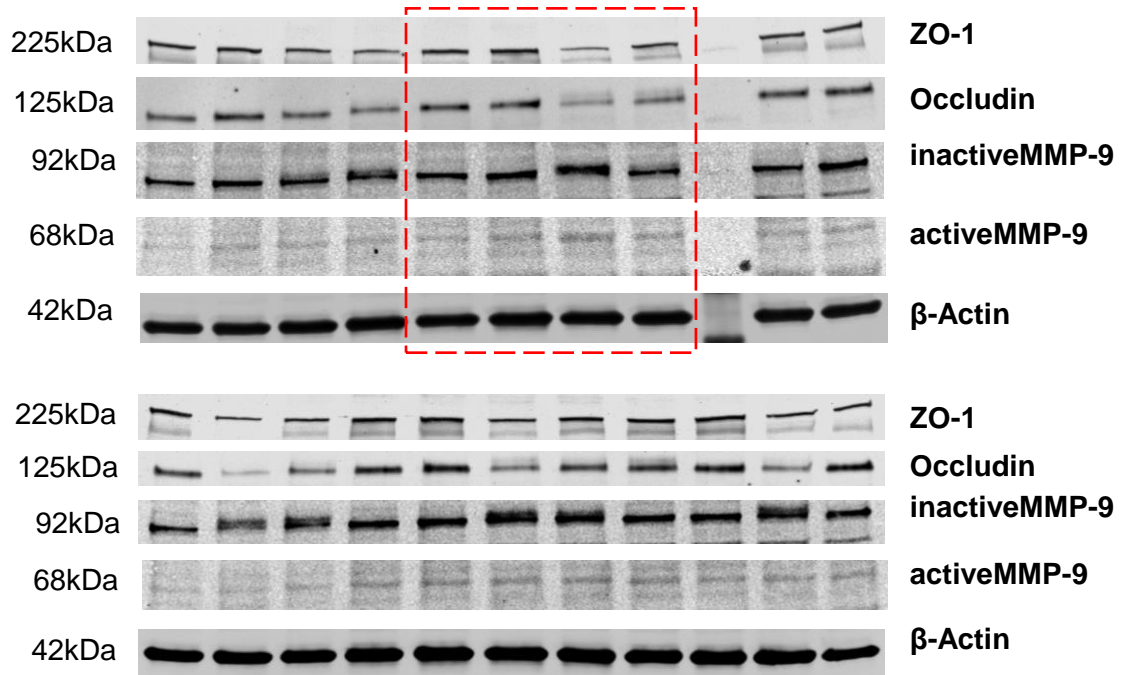

**Fig8I**

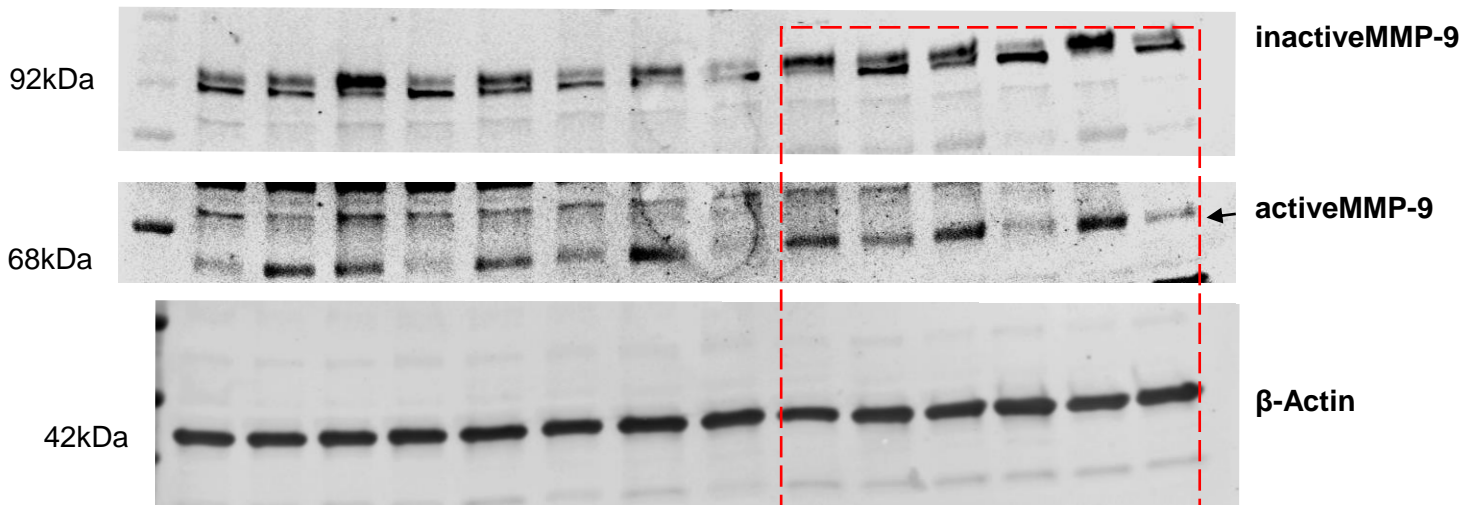

Supplement: 12974_2023_2907_MOESM6_ESM.pdf [file 12974_2023_2907_MOESM6_ESM.pdf]
